# Supplementary material for: Tumor-conditional anti-CTLA4 uncouples antitumor efficacy from immunotherapy-related toxicity
Source: JCI journal article supplement (doi:10.1172/jci123391), 2018-12-09
Supplement: sd1 [file 1]

## Supplemental Data

### **Tumor-conditional anti-CTLA-4 uncouples anti-tumor efficacy from immunotherapy-related toxicity**

Chien-Chun Steven Pai<sup>†,1</sup>, Donald M Simons<sup>†,2,3</sup>, Xiaoqing Lu<sup>2</sup>, Michael Evans<sup>4</sup>, Junnian Wei<sup>4</sup>, Yung-hua Wang<sup>4</sup>, Mingyi Chen<sup>5</sup>, John Huang<sup>1</sup>, Chanhyuk Park<sup>1</sup>, Anthony Chang<sup>1</sup>, Jiayi Wang<sup>1</sup>, Susan Westmoreland<sup>2</sup>, Christine Beam<sup>2</sup>, Dave Banach<sup>2</sup>, Diana Bowley<sup>2</sup>, Feng Dong<sup>2</sup>, Jane Seagal<sup>2</sup>, Wendy Ritacco<sup>2</sup>, Paul L. Richardson<sup>6</sup>, Soumya Mitra<sup>2</sup>, Grace Lynch<sup>2</sup>, Pete Bousquet<sup>2</sup>, John Mankovich<sup>6</sup>, Gillian Kingsbury<sup>††,2,3</sup> and Lawrence Fong<sup>††,1,7</sup>

<sup>†</sup>These authors contributed equally to this work

<sup>††</sup> These authors contributed equally and are co-corresponding authors.

<sup>1</sup>Department of Hematology and Oncology, School of Medicine, University of California, San Francisco, CA 94143, USA

<sup>2</sup>Abbvie Bioresearch Center; 100 Research Drive, Worcester, MA 01581, USA

<sup>3</sup>Former Research Scientist at Abbvie

<sup>4</sup>Department of Radiology and Biomedical Imaging, School of Medicine, University of California, San Francisco, CA 94158, USA

<sup>5</sup>Department of Hematopathology, School of Medicine, University of Texas Southwestern Medical Center, Dallas, TX 75390, U.S.A

<sup>6</sup>Abbvie Inc. 1 North Waukegan Rd, North Chicago, IL 60064

<sup>7</sup>Parker Immunotherapy Institute, Helen Diller Family Comprehensive Cancer Center, University of California San Francisco, San Francisco, CA 94143, USA

#### **Corresponding author:**

Lawrence Fong

University of California San Francisco, 513 Parnassus Avenue, Room HSE301A, Box 0519, San Francisco, CA 94143-0519. Phone: 415-514-9301. Email: lawrence.fong@medicine.ucsf.edu

Gillian Kingsbury

Agios Pharmaceuticals. 88 Sidney Street, Cambridge, MA 02139. Phone: 617-649-2025.

Email: Gillian.Kingsbury@agios.com

Table 1. Key reagents

| <b>In vivo antibodies</b>        |                   |                                                                                                                       |
|----------------------------------|-------------------|-----------------------------------------------------------------------------------------------------------------------|
| <b>Reagents</b>                  | <b>Source</b>     | <b>Note</b>                                                                                                           |
| Anti-CTLA-4                      | Abbvie            | 24H2 Clone/ Rat anti-mouse CTLA-4 with mlgG2a/k constant regions/ In vivo injection                                   |
| Anti-CTLA-4 DVD                  | Abbvie            | 24H2 Clone/ Rat anti-mouse CTLA-4 with mlgG2a/k constant regions/ In vivo injection/ With PSCA targeting outer domain |
| Anti-PSCA                        | Abbvie            | 10E8 clone/ Rat anti-mouse PSCA with mlgG2a/k constant regions                                                        |
| mlgG2a/k                         | Abbvie            | Isotype control                                                                                                       |
| <sup>89</sup> Zr-anti-CTLA-4     | Abbvie/UCSF       | 24H2 clone with radio isotope labeling/ Image studies                                                                 |
| <sup>89</sup> Zr-anti-CTLA-4 DVD | Abbvie/UCSF       | 24H2 clone with radio isotope labeling/ Image studies                                                                 |
| <b>Cell lines</b>                |                   |                                                                                                                       |
| <b>Cell lines</b>                | <b>Source</b>     | <b>Note</b>                                                                                                           |
| TRAMP-C2                         | ATCC              | Murine prostate adenocarcinoma                                                                                        |
| HEK293 (PSCA overexpressing)     | ATCC/Abbvie       | PSCA overexpressing cell line/ Semi-adherent HEK293 engineered by Abbvie.                                             |
| HEK293 (CTLA-4 overexpressing)   | ATCC/ Abbvie      | CTLA-4 overexpressing cell line/ Semi-adherent HEK293 engineered by Abbvie.                                           |
| <b>Mouse</b>                     |                   |                                                                                                                       |
| <b>Strain</b>                    | <b>Source</b>     | <b>Note</b>                                                                                                           |
| C57BL/6j                         | Jackson           | Cat# 000664                                                                                                           |
| Rag 1-/-                         | Jackson           | Cat# 002216                                                                                                           |
| BALB/c                           | Taconic           | Model# BALB                                                                                                           |
| C.B17 SCID                       | Taconic           | Model# CB17SC                                                                                                         |
| <b>Flow Antibodies</b>           |                   |                                                                                                                       |
| <b>Antibodies</b>                | <b>Source</b>     | <b>Note</b>                                                                                                           |
| CD4                              | Biologend         | Clone: GK1.5 / Cat#100447                                                                                             |
| CD8                              | BD Bioscience     | Clone: 53-6.7/ Cat#552877                                                                                             |
| CD8                              | Biologend         | Clone: 53-6.7/ Cat#100743                                                                                             |
| CD45                             | Biologend         | Clone: 30-F11/ Cat#103138                                                                                             |
| CD3                              | BD Bioscience     | Clone: 145-2C11/ Cat#563565                                                                                           |
| Foxp3                            | eBioscience       | Clone: FJK-16s/ Cat# 11-5773-82                                                                                       |
| CD44                             | BD Bioscience     | Clone: IM7/ Cat#563736                                                                                                |
| Spas-1                           | NIH tetramer core | Sequence: STHVNHLHC, H-2D <sup>b</sup>                                                                                |
| CD25                             | Biologend         | Clone: PC61/ Cat#102026                                                                                               |
| CD45RB                           | BD Bioscience     | Clone: 16A/Cat#553100                                                                                                 |
| TNF-alpha                        | eBioscience       | Clone: MP6-XT22/ Cat# 12-7321-81                                                                                      |
| ICOS                             | BD Bioscience     | Clone: 7E.17G9/Cat#564070                                                                                             |
| ICOS                             | eBioscience       | Clone: C398.4A/ Cat# 25-9949-82                                                                                       |
| Ki-67                            | BD Bioscience     | Clone: B56/ Cat# 566109.                                                                                              |
| Zombie dye                       | Biologend         | Live/dead staining                                                                                                    |

Supplemental Figure 1

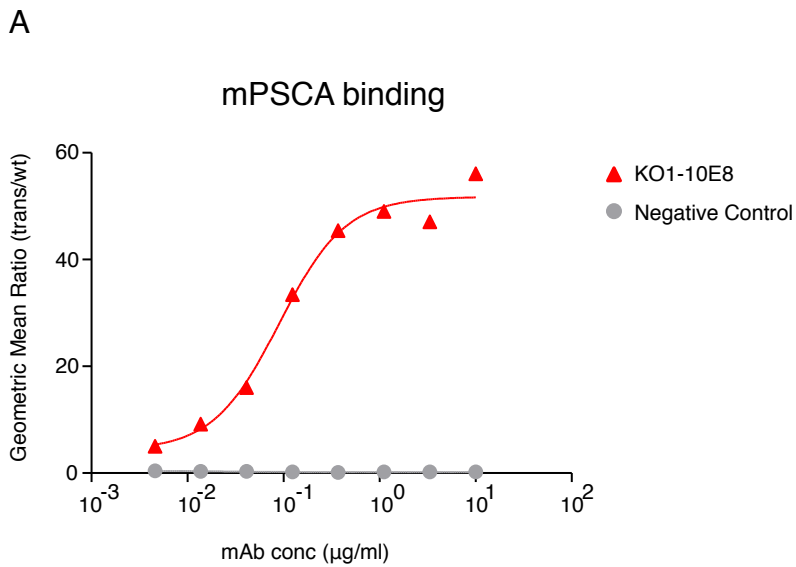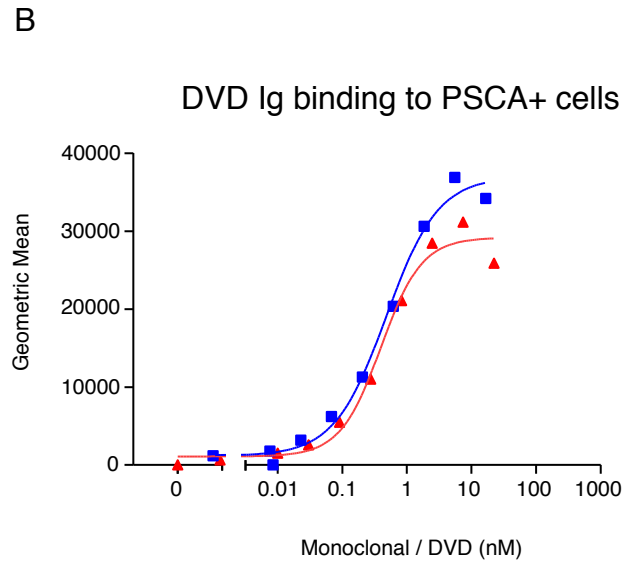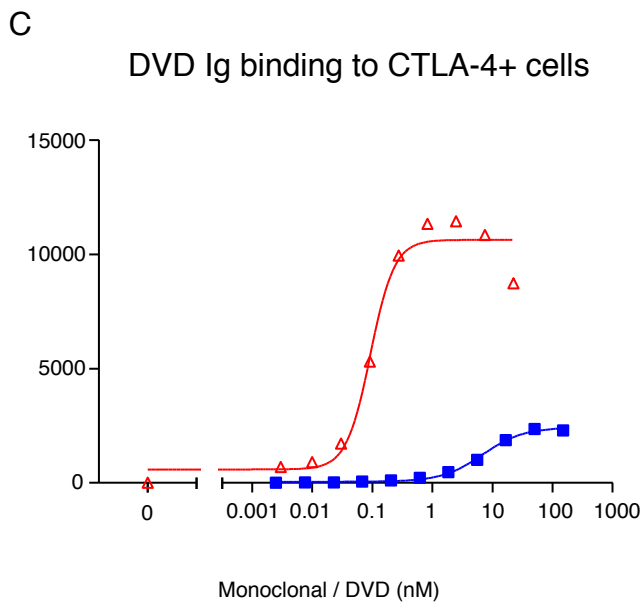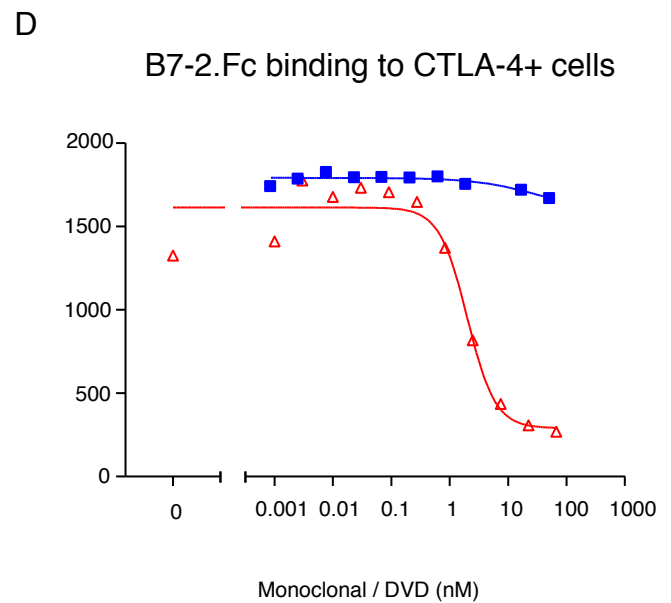

▲ α-PSCA      ▲ α-CTLA-4      ■ Intact (DVD 4780)

**Supplemental Figure 1. Characterization of PSCA mAb 10E8 and generation of PSCA/CTLA-4 DVD Ig molecules.**

(A) A chimeric anti-mouse PSCA antibody derived from the variable domains of the KO1-10E8 hybridoma was expressed as mouse isotype IgG2a and tested for binding to mouse PSCA overexpressing HEK293 cells. (B and C) A candidate PSCA/CTLA-4 DVD Ig was tested for binding to HEK293 cells overexpressing PSCA or CTLA-4. (D) The DVD Ig from C was evaluated for neutralization of B7-2.Fc binding to CTLA-4 overexpressing HEK293 cells by FACS. Representative figure from each in vitro experiment was shown. Each experiment was conducted three times independently.

## Supplemental Figure 2

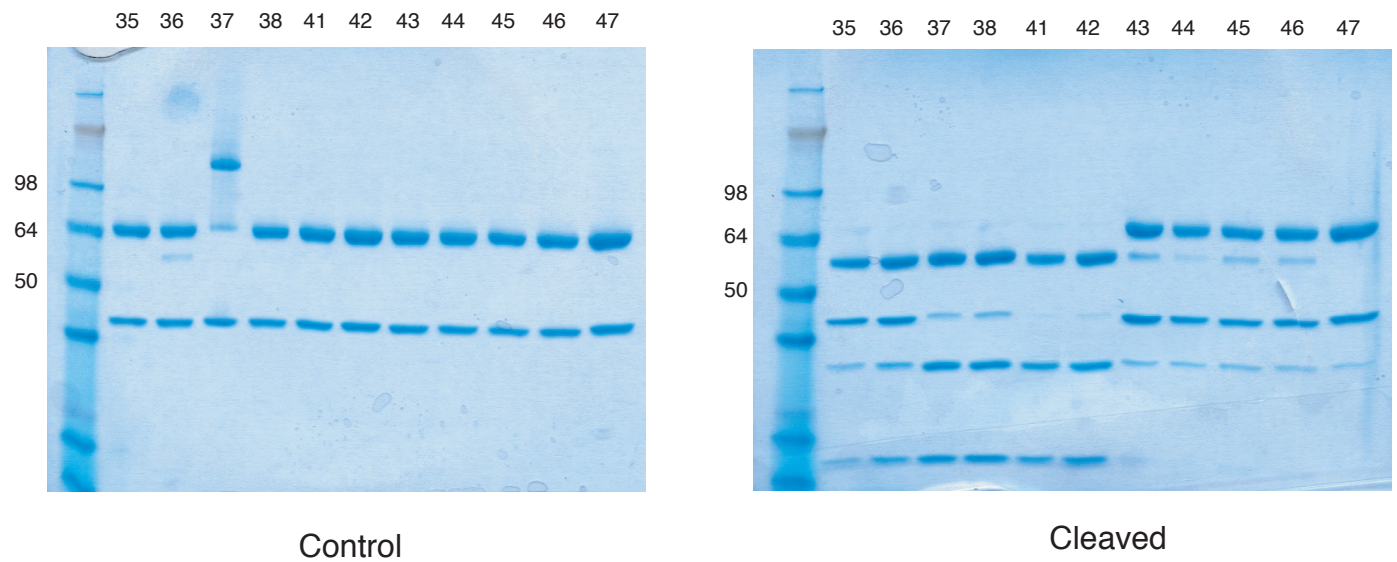

### Supplemental Figure 2. Original raw gel files of Figure 3B.

This figure shows the raw gel files. The antibodies are DVD5035 (35), DVD 5036 (36), DVD5037 (37), DVD5038 (38), DVD5041 (41), DVD5042 (42) respectively. DVD 5047 (47) is the linker control (non-cleavable). The remaining lanes are DVD Ig with optimized linkers that are cleaved less efficiently.

$^{89}\text{Zr}$ - $\alpha$ -CTLA-4 Biodistribution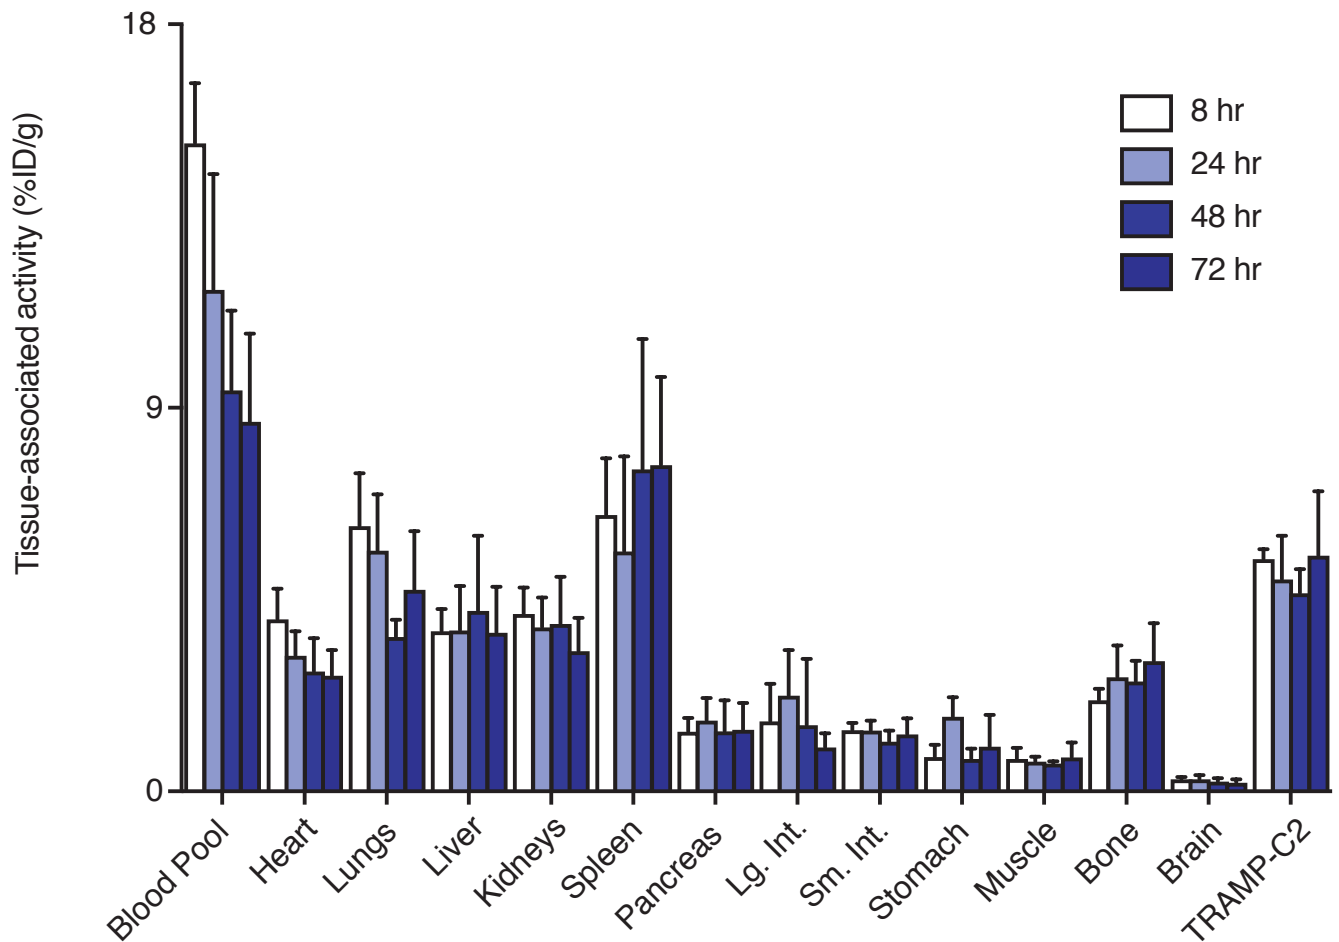**Supplemental Figure 3. Tissue distribution of CTLA-4 blockades over time.**

A time course study showing the biodistribution of  $^{89}\text{Zr}$ - $\alpha$ -CTLA-4 in intact male C57BL6/j mice with subcutaneous TRAMP-C2 xenografts. Tumor uptake was consistent between 8 – 72 hours, while retention of the radiotracer in normal tissues generally declined from 8 – 72 hours. Bone uptake of the radiotracer was low, underscoring that the  $^{89}\text{Zr}$ - $\alpha$ -CTLA-4 construct is stable in vivo. These data were used to identify that 48 hours post injection was a suitable time point for comparing the intact and cleavable antibodies. Data were collected from 4 mice per time point for a total of 16 mice from one experiment. Bars represent mean  $\pm$  SE

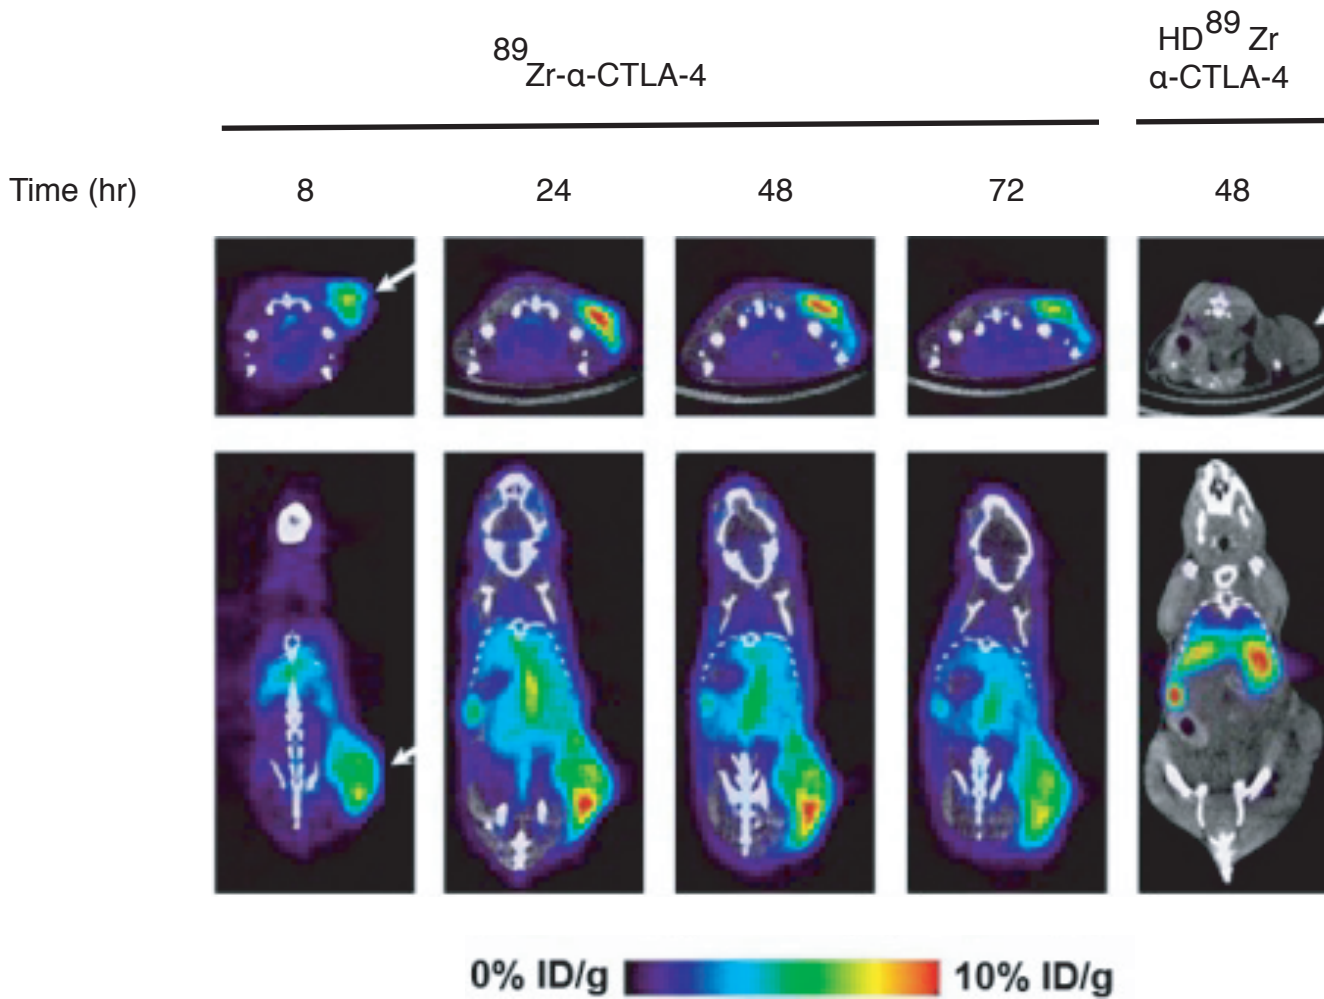

**Supplemental Figure 4. Tissue distribution of CTLA-4 and heat-denatured CTLA-4 blockades.** Representative transverse and coronal PET images from mice treated with  $^{89}\text{Zr-}\alpha\text{-CTLA-4}$  from Supplemental Figure 3. Tumor uptake was visible from 8 – 72 hours post injection (white arrow), as well as uptake in the liver. Heat-denatured  $^{89}\text{Zr-}\alpha\text{-CTLA-4}$  (HD) was not detected in the tumor, as expected.

Supplemental Figure 5

A

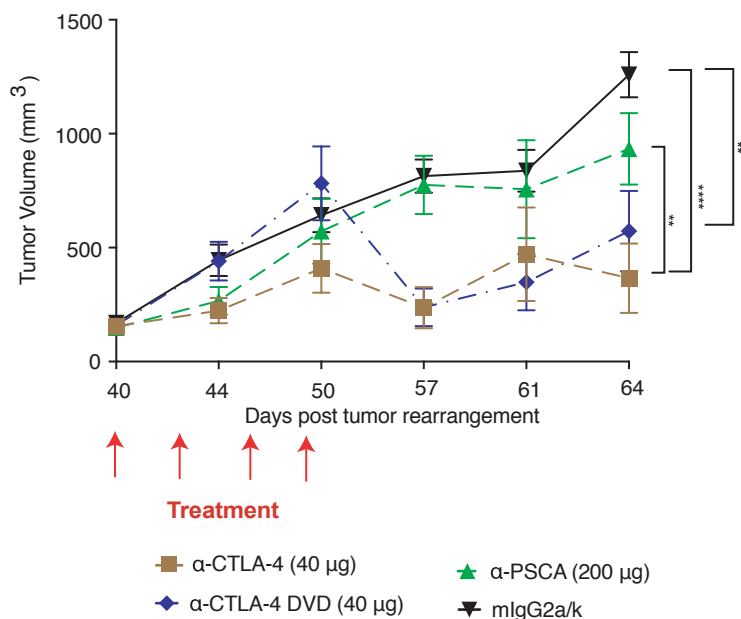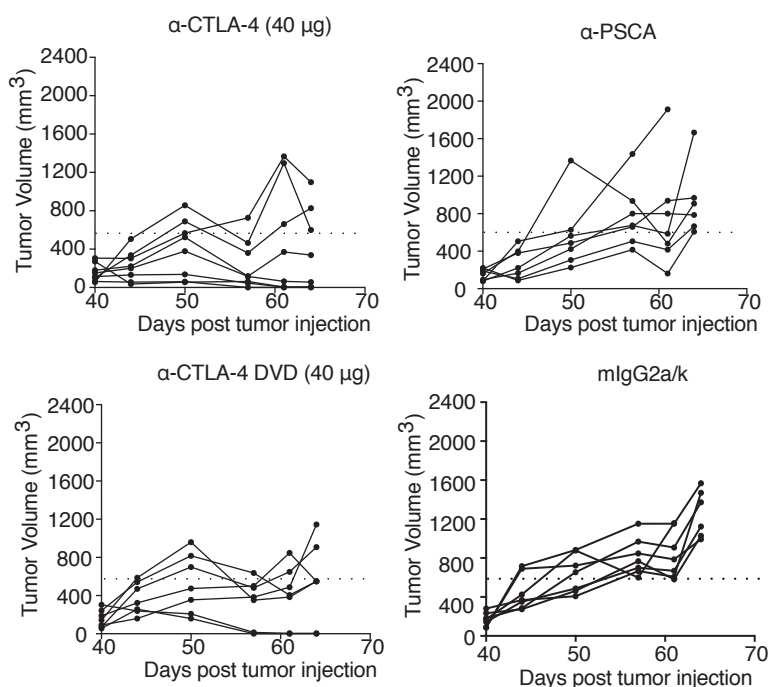

B

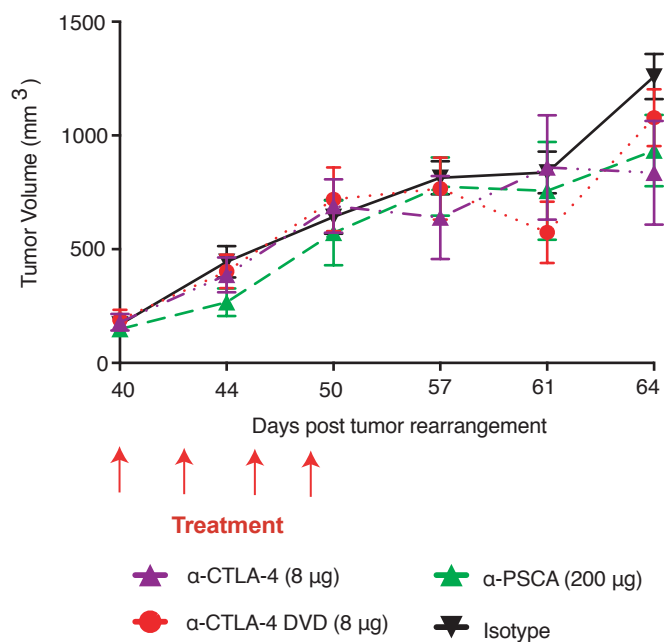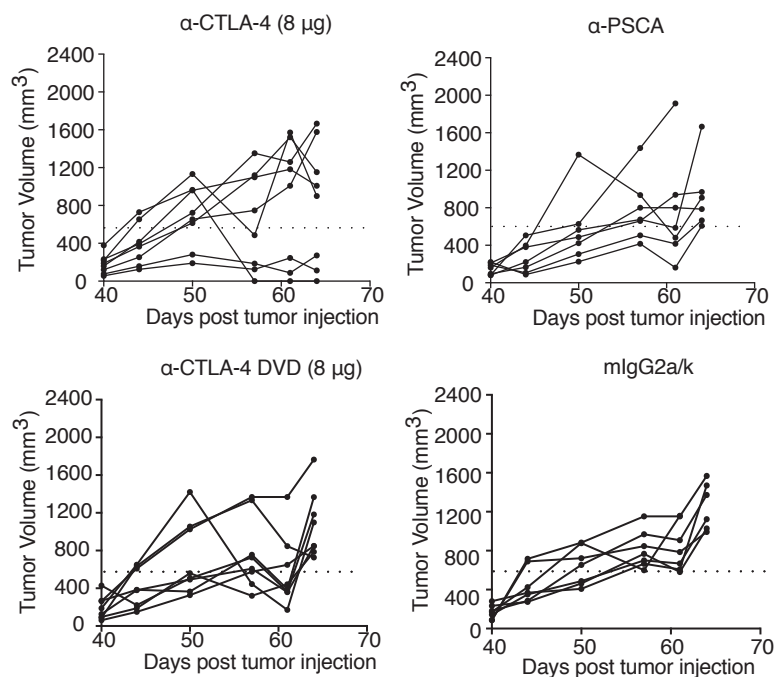

**Supplemental Figure 5. Dose responses of α-CTLA-4 DVD in anti-tumor activities.**

C57BL/6j male mice were implanted with TRAMP-C2 tumors at Day 0, and tumors were allowed to grow for 40 days. Mice were randomized into different treatment groups before antibody injection and then received different treatments at day 43, day 46, and day 49. (A) Tumor growth kinetics from mice treated with medium doses of α-CTLA-4 or α-CTLA-4 DVD. (B) Tumor growth kinetics from mice treated with low doses of α-CTLA-4 or α-CTLA-4 DVD. Data were conducted with two independent experiments. Each treatment arm was collected from 7 mice per group. Bars represent mean ± SE. Statistical significance was calculated using two-way ANOVA with post-hoc Tukey test (\*\*P<0.01, \*\*\*\*P<0.0001).

Supplemental Figure 6

A

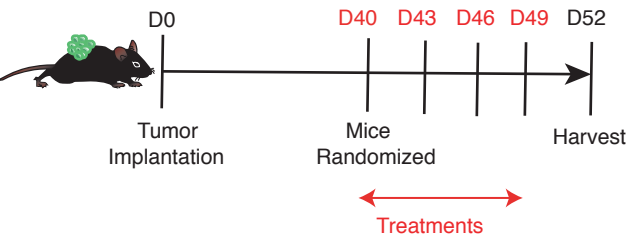

B

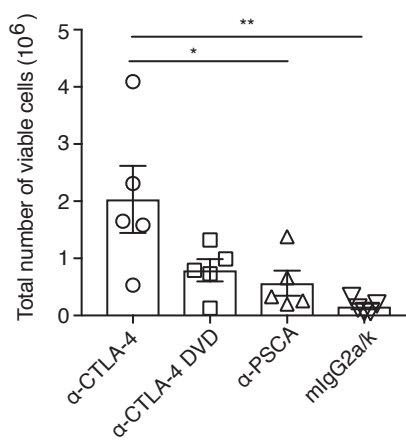

C

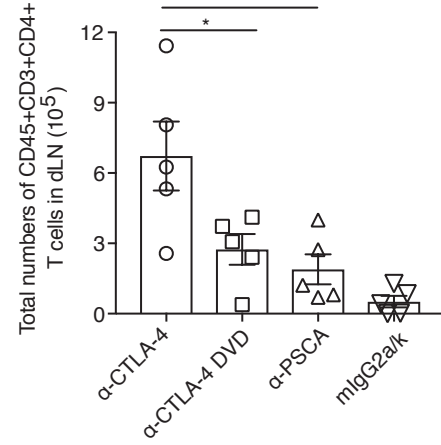

D

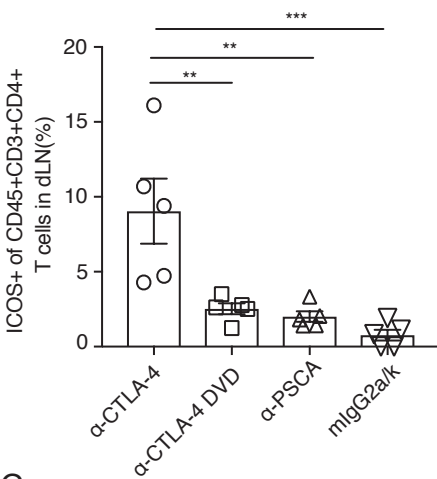

E

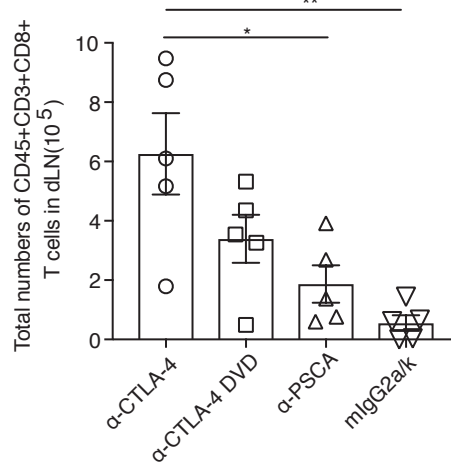

F

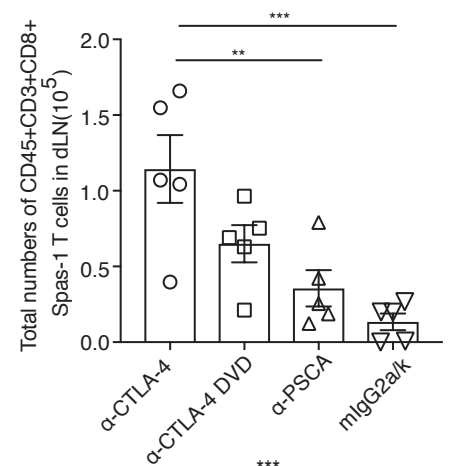

G

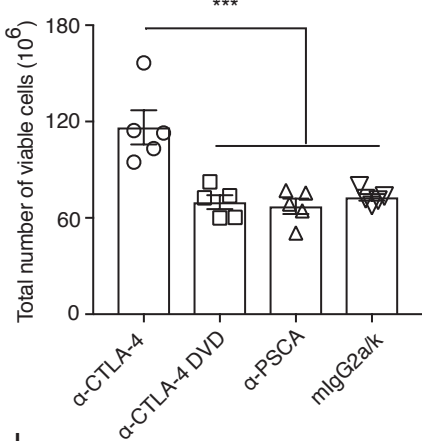

H

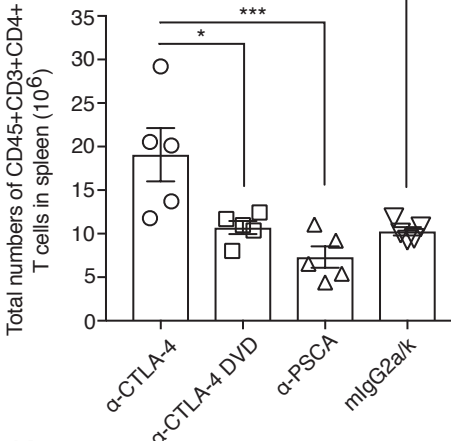

I

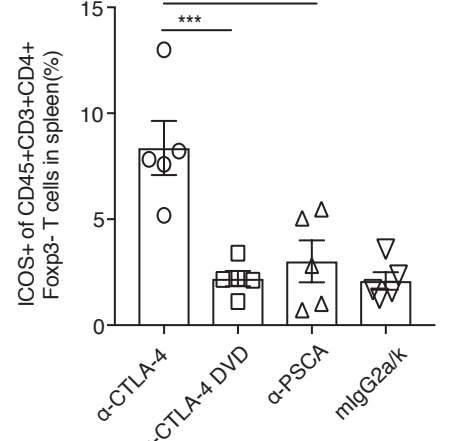

J

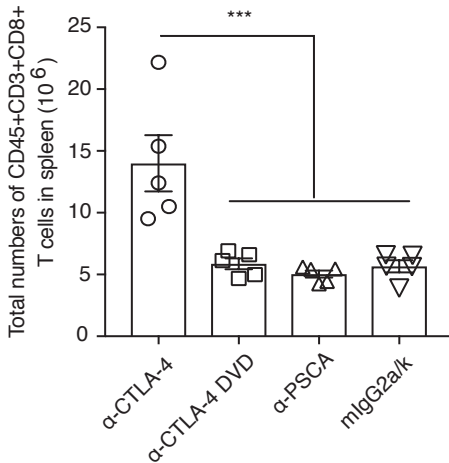

K

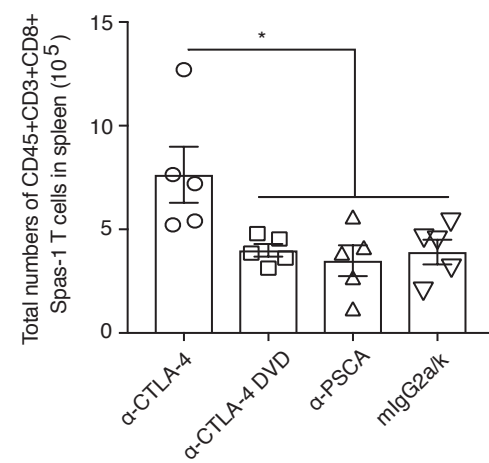

**Supplemental Figure 6. Systemic immune-profiling post checkpoint inhibitor treatments.**

C57BL/6j male mice were implanted with TRAMP-C2 tumors at day 0, and tumors were allowed to grow for 40 days. Mice were randomized into different treatment groups before antibody injection and then received different treatments at day 43, day 46, and day 49. Draining lymph nodes (dLN) and spleens were harvested at day 52. (A) Treatment schema. (B-F) Data from dLN. (G-K) Data from spleens. Data were shown as 5 mice per group from one representative experiment. Bars represent mean  $\pm$  SE. Statistical significance was calculated using one-way ANOVA with post-hoc Tukey test (\* $P < 0.05$ , \*\* $P < 0.01$ , \*\*\* $P < 0.001$ ).
